# Supplementary material for: Impacts of an Intense Wildfire Smoke Episode on Surface Radiation, Energy and Carbon Fluxes in Southwestern British Columbia, Canada
Source: Copernicus journal article supplement (doi:10.5194/acp-2018-252), 2018-05-17
Supplement: Supplementary file 1 [file acp-2018-252-supplement.pdf]

**Supplemental Materials:** for “Impacts of an Intense Wildfire Smoke Episode on Surface Radiation, Energy and Carbon Fluxes in Southwestern British Columbia, Canada”

I.G. McKendry<sup>1</sup>, A. Christen<sup>2</sup>, S.-C. Lee<sup>1</sup>, M. Ferrara<sup>1</sup>, K.B. Strawbridge<sup>3</sup>, N. O'Neill<sup>4</sup>, A. Black<sup>5</sup>

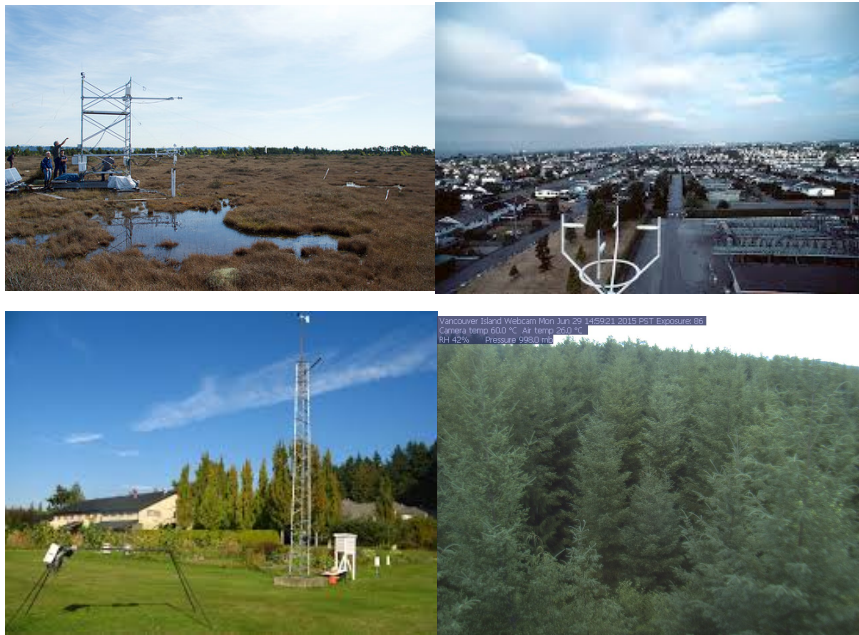

**Figure S1: Sites - clockwise from top left: Burns Bog, Vancouver-Sunset, UBC, Buckley Bay**

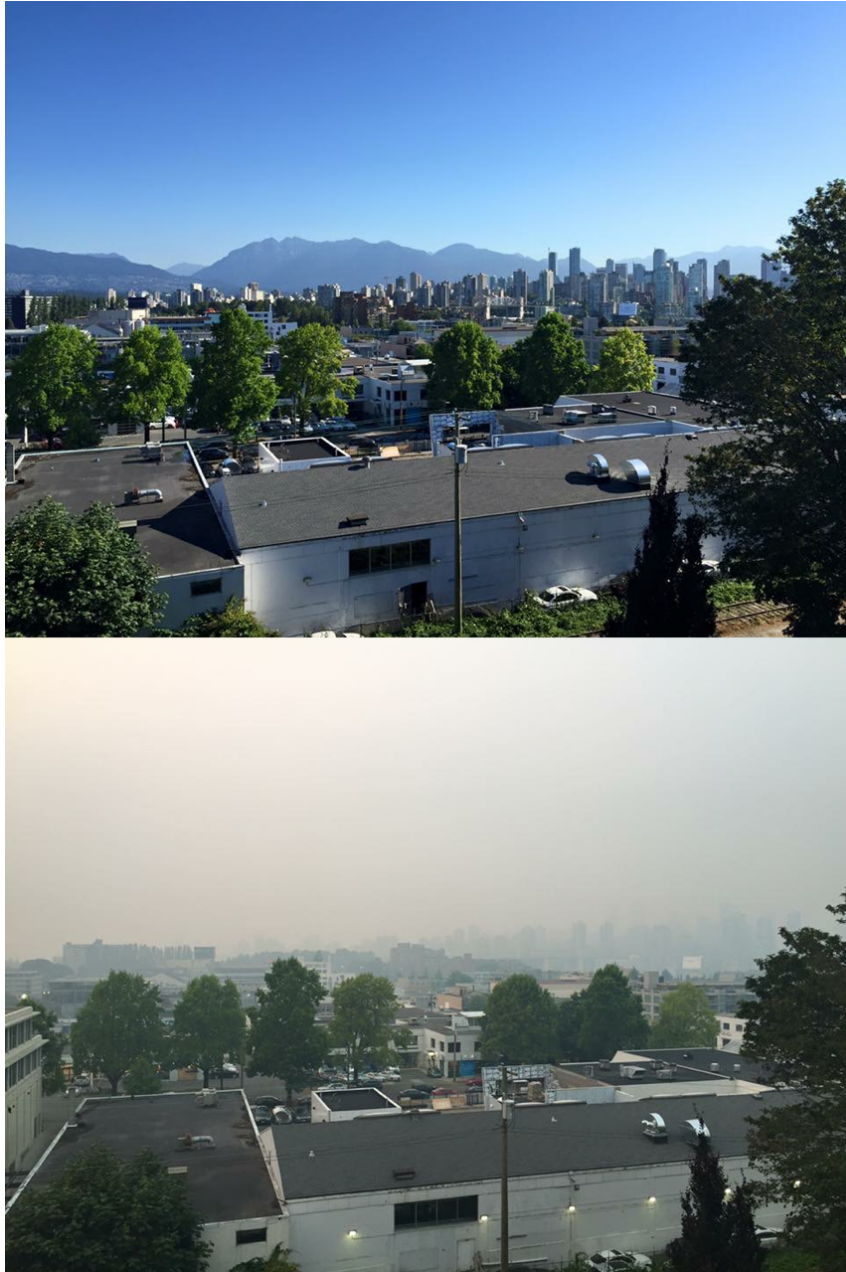

Figure S2: arrival of smoke on 5 July looking north across Vancouver compared to clear day (Photo courtesy if Elie Bou-Zeid, Princeton University)

## AMDAR:

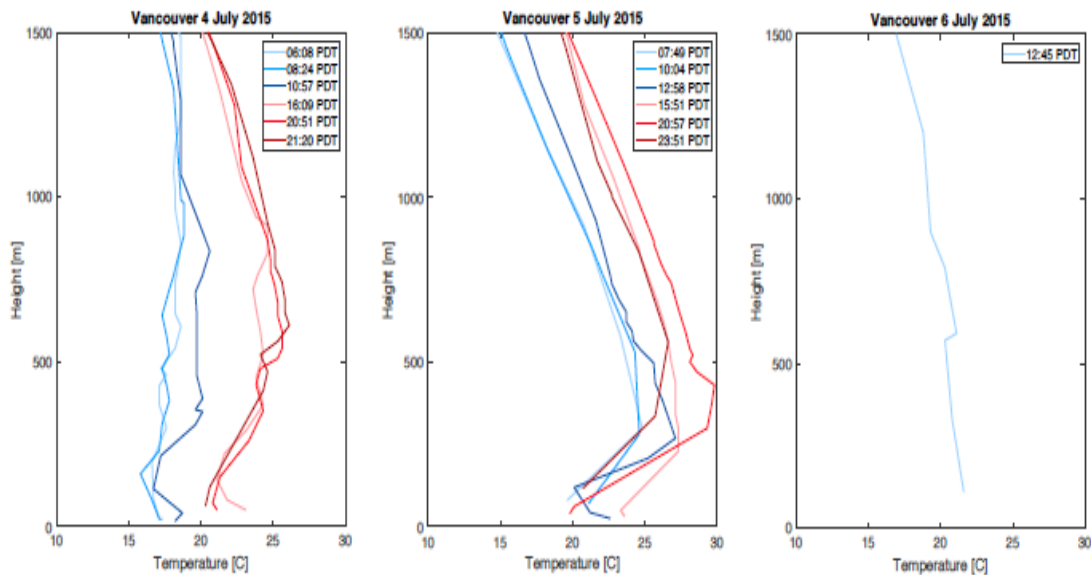

**Figure S3 – vertical profiles from AMDAR**

## HYSPLIT Modelling of the Event

Dispersion was modeled in order to confirm the smoke source using the NOAA Air Resources Laboratory HYSPLIT (HY-brid Single-Particle Lagrangian Integrated Trajectory) model Version 4 (<https://ready.arl.noaa.gov/HYSPLIT.php>). HYSPLIT 4 is the current version of a complete system for computing simple air parcel trajectories to complex dispersion and deposition simulations for any location and date (depending on data availability) using a variety of standard data input products (e.g. the NCEP Reanalysis 1948–present). For this case, the concentration fields were calculated for 24 hours for a fire source located at Elaho, covering 10000 ha and started at 0000 05 July 2015 UTC. Concentrations were averaged through a 1500m layer AGL with meteorology driven by the EDAS40 dataset.

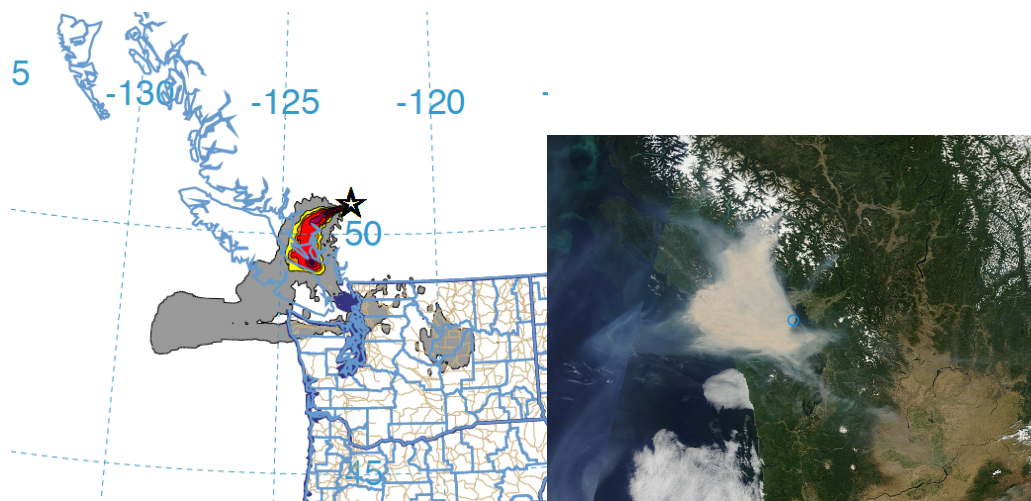

Figure S4: Modelled and observed 5 July: HYSPLIT run – 10,000 Ha, EDAS, 1500 m averaged 24 hour started 0000 5 July, UTC
